# Supplementary material for: Facilitated electron transfer by Mn dopants in 1-dimensional CdS nanorods for enhanced photocatalytic hydrogen generation
Source: Royal Society of Chemistry journal article supplement (doi:10.1039/d2ta08409k), 2023-01-01
Supplement: d2ta08409k1.pdf [file d2ta08409k1.pdf]

## Supporting Information for

### **Facilitated Electron Transfer by Mn dopants in 1-Dimensional CdS Nanorods for Enhanced Photocatalytic Hydrogen Generation**

*Walker MacSwain,<sup>a</sup> Hanjie Lin,<sup>a</sup> Zhi-Jun Li,<sup>a</sup> Shuya Li,<sup>a</sup> Chun Chu,<sup>a</sup> Lacie Dube,<sup>b</sup> Ou Chen,<sup>b</sup> Gyu Leem,<sup>c,d</sup> Weiwei Zheng.<sup>a,\*</sup>*

<sup>a</sup> Department of Chemistry, Syracuse University, Syracuse, New York 13244, United States

<sup>b</sup> Department of Chemistry, Brown University, Providence, Rhode Island, 02912, United States.

<sup>c</sup> Department of Chemistry, State University New York College of Environmental Science Forestry, Syracuse, New York 13210, United States

<sup>d</sup> The Michael M. Szwarc Polymer Research Institute, 1 Forestry Drive, Syracuse, New York 13210, United States

## Table of Contents

### I. Experimental Details

**A.** Synthesis of ZnS shell passivated 1D Mn: CdS/ZnS and Mn: CdS-Pt/ZnS core/shell NRs.

**B.** Synthesis of 1D CdS-Pt NRs.

### II. Characterization of 1D CdS-based NRs

**Figure S1.** Histograms of the diameter and length for 1D CdS, Mn: CdS, and Mn: CdS-Pt NRs, as well as histogram of the diameter for Pt NPs.

**Figure S2.** Absorbance and emission spectra of Mn: CdS/ZnS and Mn: CdS-Pt/ZnS core/shell NRs.

**Figure S3.** Type I core/shell band alignment of Mn: CdS/ZnS NRs and discussion.

**Figure S4.** PL lifetime of Mn: CdS and Mn: CdS-Pt for the 600 nm defect/Mn emission.

**Figure S5.** Structural and morphology characterization of the CdS-Pt NRs by XRD and TEM.

**Figure S6.** Absorbance, PL, and PL lifetime data of CdS-Pt NRs.

### III. Electrochemical Measurements

**Figure S7.** EIS spectra and CV of 1D CdS-Pt NRs.

**Table S1.** Bandgap and Bandedge positions of CdS, CdS-Pt, Mn: CdS, and Mn: CdS-Pt NRs.

**Figure S8.** Photocurrent measurements for the CdS, CdS-Pt, Mn: CdS, and Mn: CdS-Pt NRs.

### IV. Internal Quantum Efficiency (IQE) Calculation

**Figure S9.** Internal Quantum Efficiencies (IQE) for CdS, CdS-Pt, Mn: CdS, and Mn: CdS-Pt NRs.

### V. Photocatalytic Water Splitting Studies

**Figure S10.** Recycle test for the 1D Mn: CdS-Pt NR-based photocatalytic system over 30 hours.

**Table S2.** Recycle test ICP-OES results.

**Figure S11.** Mn dopant concentration-dependent photocatalysis of the 1D Mn: CdS-Pt NRs.

**Figure S12.** Pt reaction time-dependent studies of the Mn: CdS-Pt NR-based photocatalysis.

**Table S3.** Summary of reported CdS-based photocatalysts which utilize Pt as a cocatalyst.

## I. Experimental Details

**Chemicals.** Zinc diethyldithiocarbamate ( $\text{Zn}(\text{DDTC})_2$ , 98% Sigma-Aldrich), oleylamine (OAm, 70%, Sigma-Aldrich), 1-octadecene (ODE, 90%, Alfa-Aesar), oleic acid (OA, 90%, Sigma-Aldrich), 1, 2-dichlorobenzene ( $\geq 99\%$ , Sigma-Aldrich), diphenyl ether ( $\geq 99\%$ , Sigma-Aldrich), 1, 2-hexanediol (90%, Sigma-Aldrich), hexane (99%, EMD), ethanol ( $\geq 99\%$ , anhydrous, Pharmco) and platinum(II) acetylacetonate ( $\geq 99.98\%$ , Sigma-Aldrich). All chemicals were used as purchased without further purification.

**A. Synthesis of 1D Mn:CdS/ZnS and Mn:CdS-Pt/ZnS core/shell NRs.** Core/shell nanorods were synthesized according to a slightly modified literature procedure.<sup>1, 2</sup> Typically, the as-purified 1D Mn:CdS or Mn:CdS-Pt NRs were dissolved in 9 mL ODE and 3 mL OAm. After that 228 mg (0.63 mmol) of  $\text{Zn}(\text{DDTC})_2$  was added to the NR (0.45 mmol) solution in a three-neck flask and was vacuumed from room temperature to 80°C and kept vacuuming at 80°C for additional 1.5 hours. Under Ar flow, the reaction solution was heated to a target growth temperature at 220 °C for 1.5 hours. At the end of the reaction, the solution was removed from the heating mantle and allowed to cool to approximately 60 °C. The core/shell NRs were separated from the crude solution by precipitating the particles with ethanol and centrifuging. The precipitate was further purified once by resuspending the NRs in hexane and then reprecipitating with ethanol and centrifugation.

**B. Synthesis of 1D hybrid CdS-Pt NRs.** 1D CdS-Pt NRs were synthesized based on a slightly modified literature reference.<sup>3</sup> First, 0.2 mL OA, 0.2 mL OAm, and 43.0 mg (0.17 mmol) of 1,2-hexanediol were heated in 9 mL diphenyl ether at 80 °C under vacuum for 30 min to remove traces of water. The optical density (OD) of the CdS-based NR stock solution can be measured by diluting the stock solution of NRs (100  $\mu\text{L}$  into 1 mL *i.e.*, 100x dilution) and the OD of the NR stock solution can be calculated by the absorbance of the diluted solution multiplied by 100. 65.5 mg (0.17 mmol) Pt acetylacetonate was added to the suspension of the synthesized CdS stock solution (OD = 20) in 3 mL of 1, 2 dichlorobenzene and sonicated at 65 °C for 10 min to promote dissolution of the Pt precursor. The reaction mixture was purged with Ar and heated to 200 °C before injecting the 3 mL suspension of Pt precursor and NRs. Typically, after 10 minutes the reaction was removed from heat and quenched in a water bath. The product was washed by precipitation in ethanol followed by centrifugation. The precipitate was further purified twice by resuspending the NRs in hexane and then reprecipitating with ethanol and centrifuging.

## II. Characterization of 1D CdS-based NRs

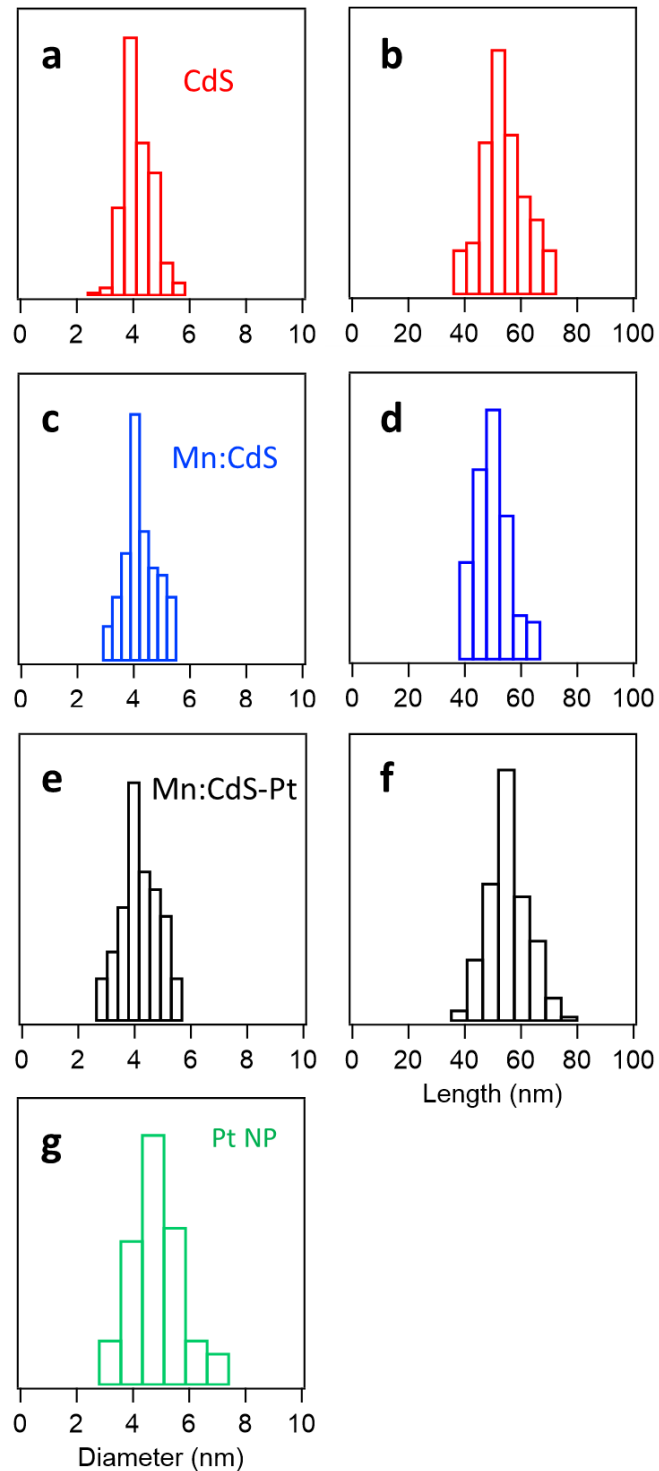

**Figure S1.** Histograms of the diameter and length of 1D CdS (a-b), Mn:CdS (c-d), and Mn:CdS-Pt (e-f) NRs. g) Histogram of the diameter of the Pt NP tips on the Mn:CdS-Pt NRs.

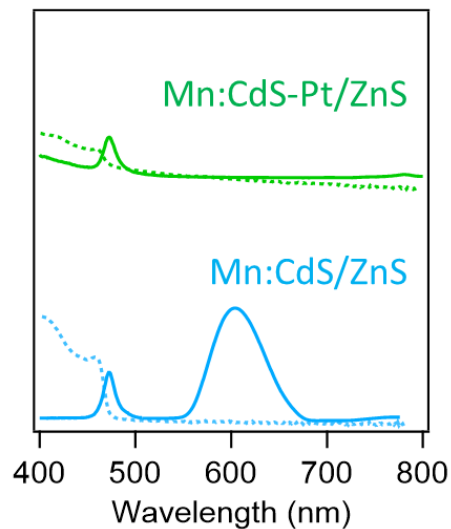

**Figure S2.** Absorbance (dashed lines) and PL spectra (solid lines) of ZnS shelled Mn:CdS/ZnS and Mn:CdS-Pt/ZnS core/shell NRs.

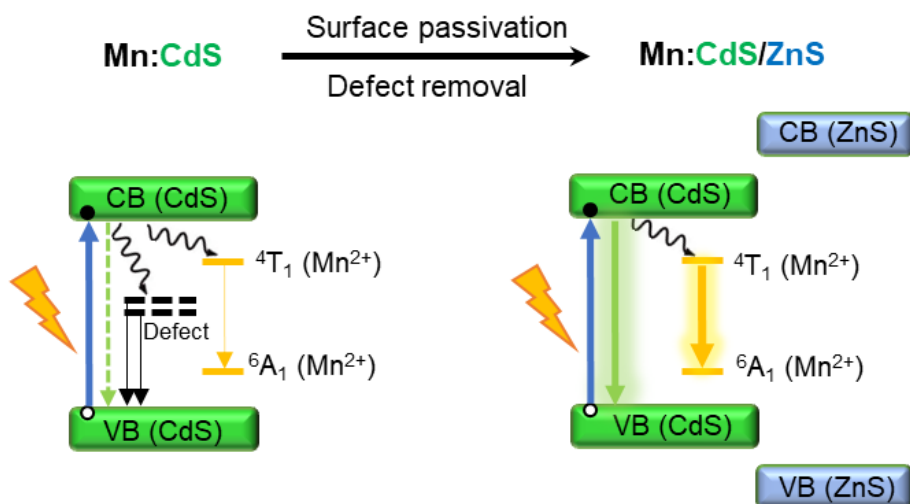

**Figure S3.** ZnS Shell passivation for type I Mn:CdS/ZnS core/shell NCs with high CdS host and  $\text{Mn}^{2+}$  dopant PL intensity by the removal of surface defects/trap states. In the Type I system, the bandgap of the core material (CdS) is smaller than the bandgap of the shell material (ZnS) with the excited electrons and holes confined inside the CdS core.<sup>4</sup>

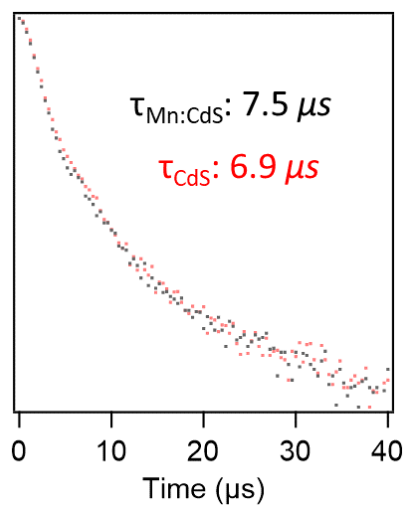

**Figure S4.** PL decay of Mn:CdS and CdS NRs (monitored at 600 nm). The decay times of the defect/Mn emission at 600 nm are  $7.5 \mu\text{s}$  and  $6.9 \mu\text{s}$  for Mn:CdS and CdS NRs, respectively.

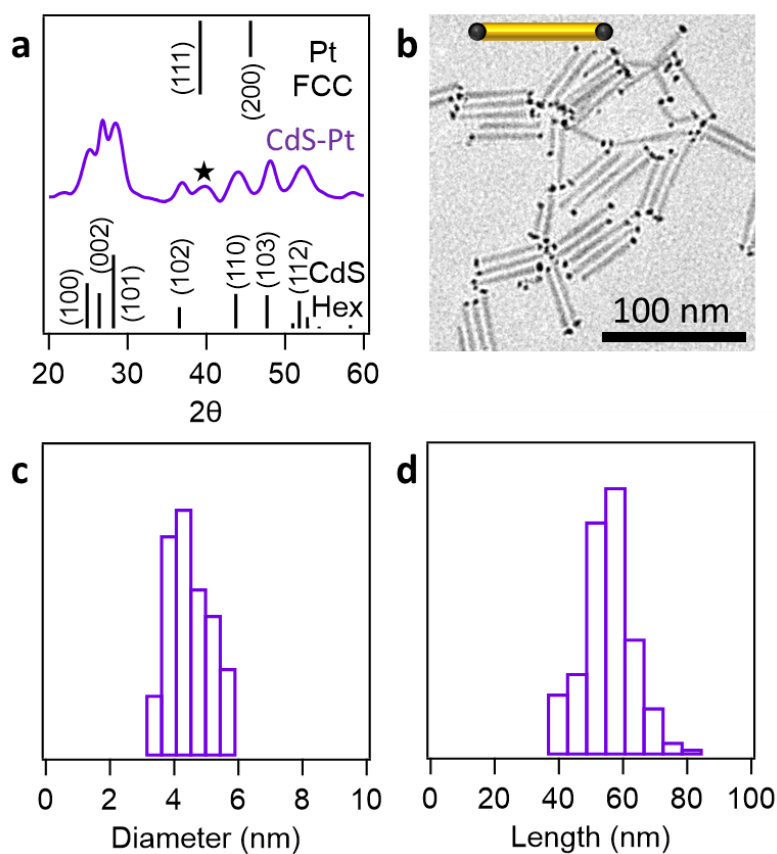

**Figure S5.** Structural and morphology characterization of the CdS-Pt NRs. a) the powder XRD pattern of CdS-Pt NRs (★ indicates the diffraction peak from Pt). b) the TEM, c) histogram of the diameter and d) histogram of the length of CdS-Pt NRs.

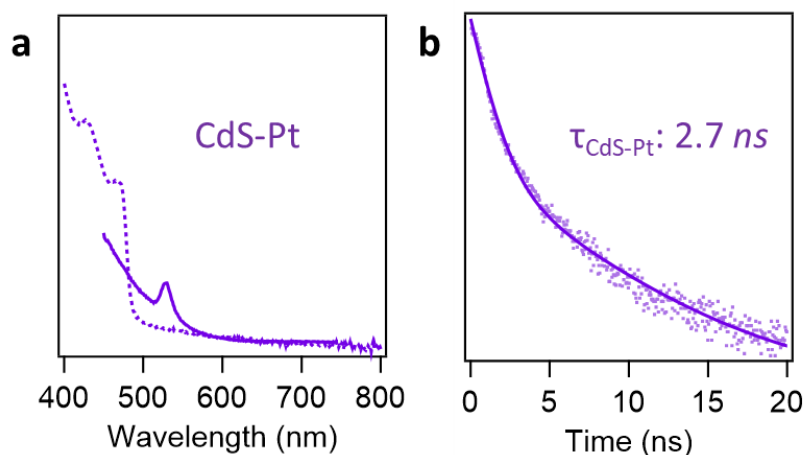

**Figure S6.** a) Normalized absorbance and emission spectra of CdS-Pt NRs and b) PL decays of the CdS of 1D CdS-Pt NRs.

### III. Electrochemical Measurements.

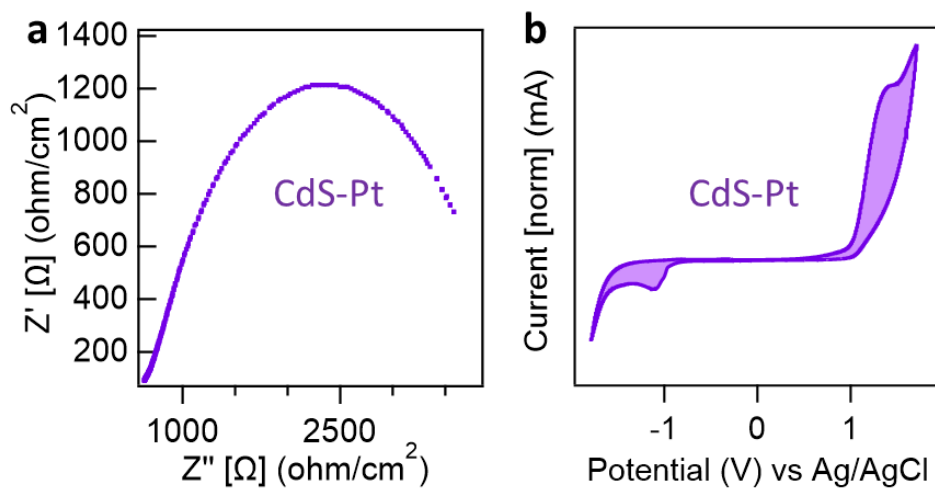

**Figure S7.** a) EIS (Nyquist plot) of and b) Normalized cyclic voltammetry spectra of 1D CdS-Pt NRs.

**Table S1.** The bandgaps and bandedge positions of the valence and conduction bands of the NRs.

|         | CdS  | CdS-Pt | Mn:CdS | Mn:CdS-Pt |
|---------|------|--------|--------|-----------|
| Bandgap | 2.7  | 2.6    | 2.6    | 2.6       |
| VB      | 1.5  | 1.4    | 1.4    | 1.4       |
| CB      | -1.2 | -1.2   | -1.2   | -1.2      |

**Note:** The oxidation potentials are calculated from the CV, while the reduction potentials are calculated from Tauc plots of the absorbance spectra.

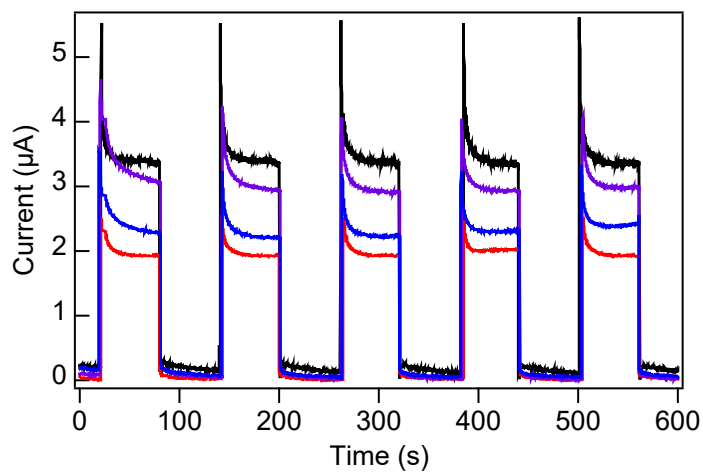

**Figure S8.** Photocurrent responses to on-off illumination of the CdS NRs (red), Mn:CdS NRs (blue), CdS-Pt NRs (purple), and Mn:CdS-Pt NRs (black) electrodes.



## IV. Internal Quantum Efficiency (IQE) Calculations

The photochemical reactions for IQE were performed using a solar simulator (AM1.5G, 100 mW/cm<sup>2</sup>, Newport 91160) irradiating the 4.8 cm<sup>2</sup> surface of the centrifuge tube reactor under stirring at 1000 rpm. The volume of the generated H<sub>2</sub> gas was collected in a burette and recorded every 15 minutes. For example, the Mn:CdS-Pt NRs generated 6.8 mL under solar simulated irradiation for 1 hr. Internal quantum efficiency can be defined as the ratio between the charge utilization of a photocatalytic system divided by the number of photons that reach the cell's surface.<sup>5</sup> The relationship of quantum efficiency to photocatalytic water splitting is defined in equation 1 and 2.

$$QE(\%) = \frac{\text{reacted electrons}}{\text{incident photons}} \times 100\% \text{ (Eq. 1)}$$

$$QE(\%) = \frac{\# \text{ of H}_2 \text{ molecules} \times 2}{\text{incident photons}} \times 100\% \text{ (Eq. 2)}$$

The QE ratio can mathematically be described then by equation 3 where the  $\Delta G^0$  (J mol<sup>-1</sup>) as the standard Gibbs free energy for the formation of H<sub>2</sub> molecules,  $R$  (mol s<sup>-1</sup>) as the rate of generation of H<sub>2</sub> molecules,  $E_s$  (J s<sup>-1</sup> m<sup>-2</sup>) as the incident photons, and  $A$  (m<sup>2</sup>) as the irradiated area of the photochemical system.<sup>6</sup>

$$QE(\%) = \frac{\Delta G^0 R}{E_s A} \times 100\% \text{ (Eq. 3)}$$

$\Delta G$  can be obtained from the Equation 4 below, which is the Nernst equation where  $n$  is the number of electrons transferred in the reaction,  $F$  (C mol<sup>-1</sup>) is Faraday's constant, and  $E$  (V) is the potential difference.

$$\Delta G = -nFE \text{ (Eq.4)}$$

Finally, the IQE can be calculated by combining equations 2-4, given that the potential of photocatalytic water splitting is -1.23 V, the photocatalytic system has 0.151 W/cm<sup>2</sup> of photon irradiation of which the CdS based NRs can only absorb ~20% of the total irradiation (Figure 2a in the main manuscript), the area irradiated is 4.87 cm<sup>2</sup>, and the rate can be calculated by converting the moles of hydrogen generated into a rate of mol per second. The as calculated internal quantum efficiencies are given in Figure S7 below.

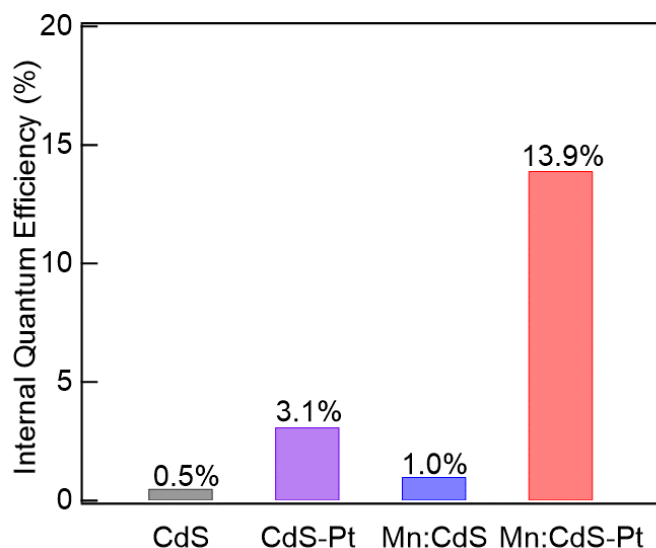

**Figure S9.** The experimentally measured internal quantum efficiencies of the 1D CdS, CdS-Pt, Mn:CdS, and Mn:CdS-Pt NRs.

## V. Photocatalytic Water Splitting Studies

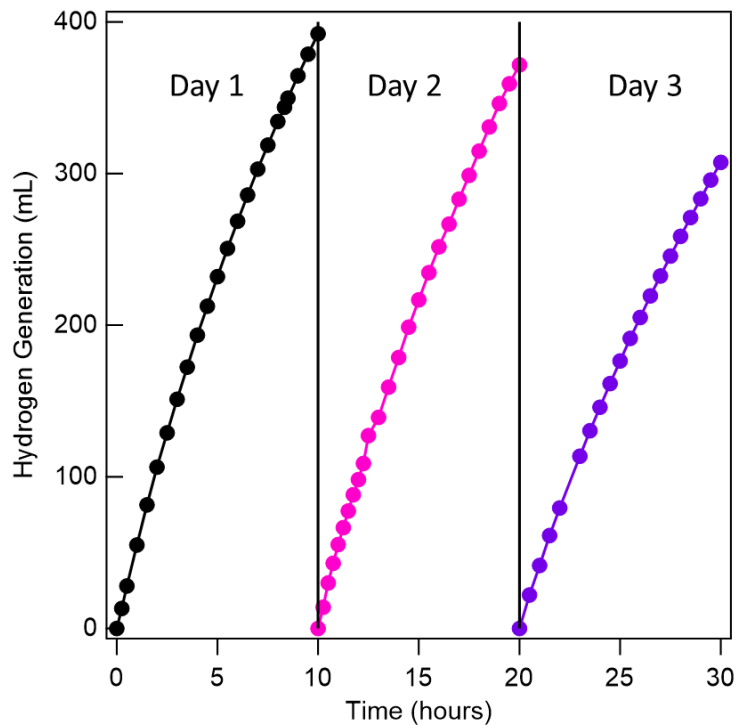

**Figure S10.** Long-term recycle studies for the 1D Mn:CdS-Pt NR-based photocatalytic system. The photochemical system was allowed to react for a cycle of 10 hours, then the photocatalyst was recollected by centrifugation, the solution remade with fresh reactants, and allowed to react again for 10 hours in the next cycle.

**Table S2.** Concentration of Cd (mg/L) of the initial and final photocatalytic solution, as well as the supernatant after each cycle test measured by ICP-OES.

|             | Initial Solution | Supernatant Cycle 1 | Supernatant Cycle 2 | Supernatant Cycle 3 | Supernatant Cycle 4 | Final Solution |
|-------------|------------------|---------------------|---------------------|---------------------|---------------------|----------------|
| [Cd] (mg/L) | 0.91             | 0.039               | 0.035               | 0.034               | 0.032               | 0.73           |

Elemental analysis of the supernatant of the photocatalytic solution during the centrifugation step between cycles was performed by ICP-OES to detect the concentration of Cd ions. The trace amount of Cd in the supernatant should be due to the wash losses of the NRs since it is impossible to recollect all NRs from centrifugation, as well as the possible photodegradation during the photocatalytic reactions. Since there are no significant changes in absorption peak position before and after photocatalytic reactions, no significant change in the size of the NRs is expected. Therefore, the wash and the possible photodegradation losses might be the main reason of the decreased photocatalytic performance of H<sub>2</sub> generation (~6% per cycle).

The initial concentration of Cd-ions in the photocatalytic solution from the amount of Mn:CdS-Pt NRs added into the photocatalytic solution was measured as 0.91 mg/L from ICP-OES. The [Cd] from collected supernatants after each cycle test is shown in Table 1, which indicates on average ~4.1% sample loss for each cycle due to wash losses and possible photodegradation. The average ~4.1% sample loss for each cycle is very close to the ~6% decrease of photocatalytic performance of H<sub>2</sub> generation per cycle, but with a slightly smaller value. It should be noted that after the centrifugation/cleaning process for each cycle, the samples were pipetted back to a glass tube for the next cycle test. The transfer of the NRs to and from the glass tube could also lead to the loss of trace amount of NR sample. To verify the transfer losses, we measured the [Cd] of the photocatalytic solution in the last cycle (5<sup>th</sup> cycle in the measurement), which was found to be 0.73 mg/L. The [Cd] in the photocatalytic solution in the last cycle is ~0.77 mg/L calculated from the loss of [Cd] in the supernatant of each cycle (*i.e.*, subtract the sum of the [Cd] in the supernatant cycles from 0.91 mg/L). The slightly smaller [Cd] in the final photocatalytic solution than that from the calculation of wash/photodegradation losses support the additional losses from sample transfer between centrifuge tubes and the glass tubes for photocatalytic reactions. Therefore, the sample losses from wash, transfer, and photodegradation contribute to the ~6% decrease of photocatalytic performance of H<sub>2</sub> generation per cycle.

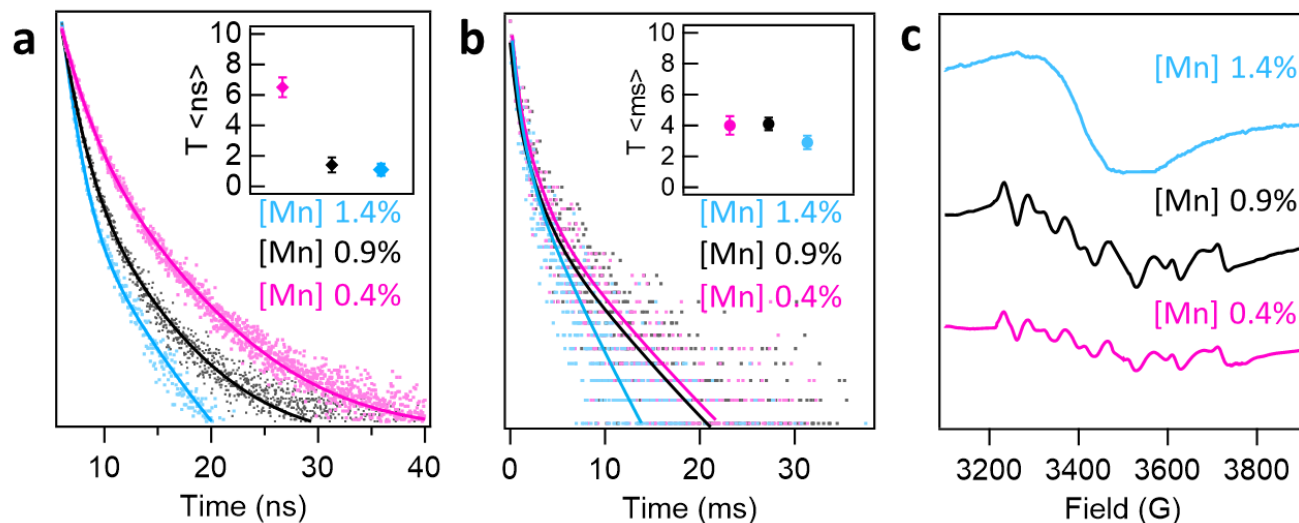

**Figure S11.**  $\text{Mn}^{2+}$  dopant concentration (0.4 - 1.4%) -dependent studies for the 1D Mn:CdS-Pt NR-based photocatalysts. a) CdS band edge PL lifetime and calculated lifetimes inset, b)  $\text{Mn}^{2+}$  dopant lifetimes of Mn:CdS/ZnS core/shell NRs with calculated lifetimes inset, and c) EPR spectra of the NRs with different doping concentration.

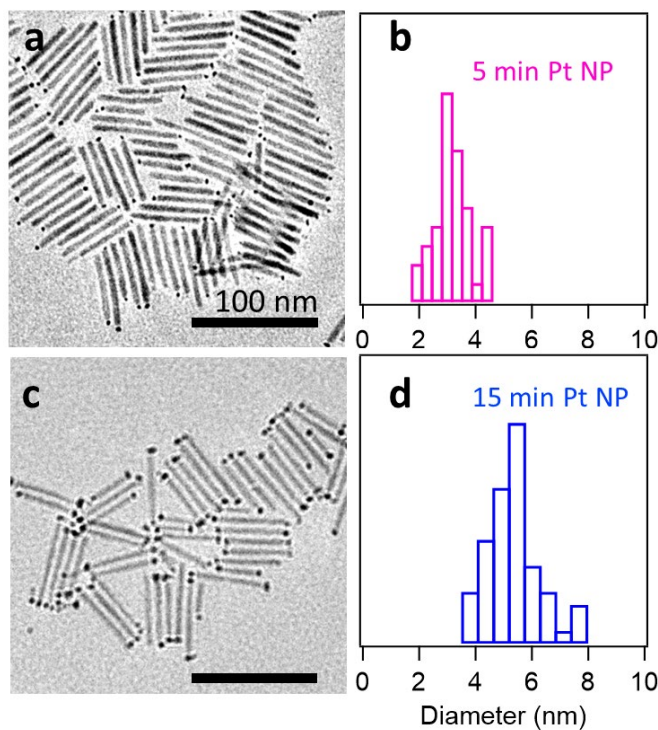

**Figure S12.** Pt reaction time-dependent studies of the Mn:CdS-Pt NR-based photocatalysts. a) TEM and b) histogram of the Pt NP diameter of 1D Mn:CdS-Pt NRs with 5 minutes Pt tipping reaction time. c) TEM and d) histogram of the Pt NP diameter of 1D Mn:CdS-Pt NRs with 15 minutes Pt tipping reaction time.

**Table S3.** Summary of reported CdS-based photocatalysts which utilize Pt as a cocatalyst.

| Photocatalyst                            | Co-catalyst | Light Source (W/nm) | Sacrificial Reagent                               | Rate ( $\mu\text{mol/h/g}$ ) | IQE (%)     | Reference        |
|------------------------------------------|-------------|---------------------|---------------------------------------------------|------------------------------|-------------|------------------|
| CdS nanowire                             | Pt          | 500 Hg/<400         | Na <sub>2</sub> S/Na <sub>2</sub> SO <sub>3</sub> | 60                           | -           | 7                |
| Hexagonal CdS                            | Pt          | 300 Xe/ $\geq$ 420  | Na <sub>2</sub> S/Na <sub>2</sub> SO <sub>3</sub> | 1,600                        | -           | 8                |
| Nanoporous CdS                           | Pt          | 300 Xe/ $\geq$ 420  | Na <sub>2</sub> S/Na <sub>2</sub> SO <sub>3</sub> | 600                          | -           | 9                |
| Mesoporous                               | Pt          | 400 Hg              | Na <sub>2</sub> S/Na <sub>2</sub> SO <sub>3</sub> | 14,150                       | -           | 10               |
| CdS microcrystal                         | Pt          | 500 Xe/ $\geq$ 400  | Na <sub>2</sub> S/Na <sub>2</sub> SO <sub>3</sub> | 4,600                        | -           | 11               |
| CdS-AgGaS <sub>2</sub>                   | Pt          | 450 Hg/ $\geq$ 420  | Na <sub>2</sub> S/Na <sub>2</sub> SO <sub>3</sub> | 2,960                        | -           | 12               |
| Ag <sub>2</sub> S/CdS                    | Pt          | Hg-Xe/>400          | Na <sub>2</sub> S/Na <sub>2</sub> SO <sub>3</sub> | 870                          | -           | 13               |
| CdS/GR                                   | Pt          | 350 Xe/ $\geq$ 420  | Lactic Acid                                       | 56,000                       | -           | 14               |
| CdS/TiO <sub>2</sub> Nanotube            | Pt          | 300 Xe/ $\geq$ 420  | Na <sub>2</sub> S/Na <sub>2</sub> SO <sub>3</sub> | 2,080                        | 0.84        | 15               |
| CdS/TiO <sub>2</sub>                     | Pt          | 450 Hg/ $\geq$ 420  | Na <sub>2</sub> S/Na <sub>2</sub> SO <sub>3</sub> | 6,720                        | -           | 16               |
| CdS/TaON                                 | Pt          | 300 Xe/=420         | Na <sub>2</sub> S/Na <sub>2</sub> SO <sub>3</sub> | 3,161                        | -           | 17               |
| CdS/TNT                                  | Pt          | 500 Xe/ $\geq$ 430  | Na <sub>2</sub> S/Na <sub>2</sub> SO <sub>3</sub> | 1,761                        | 0.12        | 18               |
| CdS/Re cellulose                         | Pt          | 250 Xe/ $\geq$ 420  | Na <sub>2</sub> S/Na <sub>2</sub> SO <sub>3</sub> | 1,320                        | -           | 19               |
| CdS/zeolite                              | Pt          | 400 Hg UV           | Na <sub>2</sub> S/Na <sub>2</sub> SO <sub>3</sub> | 6,000                        | -           | 20               |
| ZnO-CdS@Cd                               | Pt          | 300 Xe              | Na <sub>2</sub> S/Na <sub>2</sub> SO <sub>3</sub> | 19,200                       | -           | 21               |
| Ni(OH) <sub>2</sub> /CdS                 | Pt          | 300 Xe/ $\geq$ 420  | Triethylamine                                     | 5,080                        | -           | 22               |
| CdS/g-C <sub>3</sub> N <sub>4</sub>      | Pt          | 300 Xe/ $\geq$ 420  | MeOH                                              | 4,152                        | -           | 23               |
| CdS QD's/g-C <sub>3</sub> N <sub>4</sub> | Pt          | 300 Xe/ $\geq$ 400  | MeOH                                              | 17                           | -           | 24               |
| WS <sub>2</sub> /CdS                     | Pt          | 300 Xe/ $\geq$ 400  | Lactic Acid                                       | 4,200                        | -           | 25               |
| GO/CdS                                   | Pt          | 350 Hg/>420         | -                                                 | 1,120                        | -           | 26               |
| Al <sub>2</sub> O <sub>3</sub> @CdS      | Pt          | Xe/ $\geq$ 420      | -                                                 | 62                           | -           | 27               |
| <b>Mn:CdS</b>                            | <b>Pt</b>   | <b>LEDs/=405</b>    | <b>IPA/Acetone</b>                                | <b>287,000</b>               | <b>13.9</b> | <b>This work</b> |

## References.

1. Hofman, E.; Khammang, A.; Wright, J. T.; Li, Z.-J.; McLaughlin, P. F.; Davis, A. H.; Franck, J. M.; Chakraborty, A.; Meulenberg, R. W.; Zheng, W. Decoupling and Coupling of the Host–Dopant Interaction by Manipulating Dopant Movement in Core/Shell Quantum Dots. *J. Phys. Chem. Lett.* 2020, **11**, (15), 5992-5999.
2. Davis, A. H.; Hofman, E.; Chen, K.; Li, Z.-J.; Khammang, A.; Zamani, H.; Franck, J. M.; Maye, M. M.; Meulenberg, R. W.; Zheng, W. Exciton Energy Shifts and Tunable Dopant Emission in Manganese-Doped Two-Dimensional CdS/ZnS Core/Shell Nanoplatelets. *Chem. Mater.* 2019, **31**, (7), 2516-2523.
3. Habas, S. E.; Yang, P.; Mokari, T. Selective Growth of Metal and Binary Metal Tips on CdS Nanorods. *J. Am. Chem. Soc.* 2008, **130**, (11), 3294-3295.
4. Reiss, P.; Protiere, M.; Li, L. Core/Shell semiconductor nanocrystals. *Small* 2009, **5**, (2), 154-68.
5. Zhang, J.; Yu, J.; Jaroniec, M.; Gong, J. R. Noble Metal-Free Reduced Graphene Oxide-Zn<sub>x</sub>Cd<sub>1-x</sub>S Nanocomposite with Enhanced Solar Photocatalytic H<sub>2</sub>-Production Performance. *Nano Lett.* 2012, **12**, (9), 4584-4589.
6. Murugan, A. V.; Muraliganth, T.; Manthiram, A. Rapid, Facile Microwave-Solvothermal Synthesis of Graphene Nanosheets and Their Polyaniline Nanocomposites for Energy Storage. *Chem. Mater.* 2009, **21**, (21), 5004-5006.
7. Jang, J. S.; Joshi, U. A.; Lee, J. S. Solvothermal Synthesis of CdS Nanowires for Photocatalytic Hydrogen and Electricity Production. *J. Phys. Chem. C* 2007, **111**, (35), 13280-13287.
8. Bao, N.; Shen, L.; Takata, T.; Domen, K.; Gupta, A.; Yanagisawa, K.; Grimes, C. A. Facile Cd–Thiourea Complex Thermolysis Synthesis of Phase-Controlled CdS Nanocrystals for Photocatalytic Hydrogen Production under Visible Light. *J. Phys. Chem. C* 2007, **111**, (47), 17527-17534.
9. Bao, N.; Shen, L.; Takata, T.; Domen, K. Self-Templated Synthesis of Nanoporous CdS Nanostructures for Highly Efficient Photocatalytic Hydrogen Production under Visible Light. *Chem. Mater.* 2008, **20**, (1), 110-117.
10. Sathish, M.; Viswanath, R. P. Photocatalytic generation of hydrogen over mesoporous CdS nanoparticle: Effect of particle size, noble metal and support. *Catal. Today* 2007, **129**, (3-4), 421-427.
11. Muruganandham, M.; Kusumoto, Y.; Okamoto, C.; Muruganandham, A.; Abdulla-Al-Mamun, M.; Ahmmad, B. Mineralizer-Assisted Shape-Controlled Synthesis, Characterization, and Photocatalytic Evaluation of CdS Microcrystals. *J. Phys. Chem. C* 2009, **113**, (45), 19506-19517.
12. Shen, Z.; Chen, G.; Wang, Q.; Yu, Y.; Zhou, C.; Wang, Y. Sonochemistry synthesis and enhanced photocatalytic H<sub>2</sub>-production activity of nanocrystals embedded in CdS/ZnS/In<sub>2</sub>S<sub>3</sub> microspheres. *Nanoscale* 2012, **4**, (6), 2010-2017.
13. Shen, S.; Guo, L.; Chen, X.; Ren, F.; Mao, S. S. Effect of Ag<sub>2</sub>S on solar-driven photocatalytic hydrogen evolution of nanostructured CdS. *Int. J. Hydrogen Energy* 2010, **35**, (13), 7110-7115.
14. Ye, A.; Fan, W.; Zhang, Q.; Deng, W.; Wang, Y. CdS–graphene and CdS–CNT nanocomposites as visible-light photocatalysts for hydrogen evolution and organic dye degradation. *Catal. Sci. Technol.* 2012, **2**, (5), 969-978.
15. Li, C.; Yuan, J.; Han, B.; Jiang, L.; Shangguan, W. TiO<sub>2</sub> nanotubes incorporated with CdS for photocatalytic hydrogen production from splitting water under visible light irradiation. *Int. J. Hydrogen Energy* 2010, **35**, (13), 7073-7079.

16. Park, H.; Choi, W.; Hoffmann, M. R. Effects of the preparation method of the ternary CdS/TiO<sub>2</sub>/Pt hybrid photocatalysts on visible light-induced hydrogen production. *J. Mater. Chem.* 2008, **18**, (20), 2379-2385.
17. Hou, J.; Wang, Z.; Kan, W.; Jiao, S.; Zhu, H.; Kumar, R. V. Efficient visible-light-driven photocatalytic hydrogen production using CdS@TaON core-shell composites coupled with graphene oxide nanosheets. *J. Mater. Chem.* 2012, **22**, (15), 7291-7299.
18. Chen, Y.; Wang, L.; Lu, G.; Yao, X.; Guo, L. Nanoparticles enwrapped with nanotubes: A unique architecture of CdS/titanate nanotubes for efficient photocatalytic hydrogen production from water. *J. Mater. Chem.* 2011, **21**, (13), 5134-5141.
19. Ke, D.; Liu, S.; Dai, K.; Zhou, J.; Zhang, L.; Peng, T. CdS/Regenerated Cellulose Nanocomposite Films for Highly Efficient Photocatalytic H<sub>2</sub> Production under Visible Light Irradiation. *J. Phys. Chem. C* 2009, **113**, (36), 16021-16026.
20. Sathish, M.; Viswanathan, B.; Viswanath, R. Alternate synthetic strategy for the preparation of CdS nanoparticles and its exploitation for water splitting. *Int. J. Hydrogen Energy* 2006, **31**, (7), 891-898.
21. Wang, X.; Liu, G.; Wang, L.; Chen, Z.-G.; Lu, G. Q. M.; Cheng, H.-M. ZnO-CdS@Cd Heterostructure for Effective Photocatalytic Hydrogen Generation. *Adv. Energy Mater.* 2012, **2**, (1), 42-46.
22. Ran, J.; Yu, J.; Jaroniec, M. Ni(OH)<sub>2</sub> modified CdS nanorods for highly efficient visible-light-driven photocatalytic H<sub>2</sub> generation. *Green Chem.* 2011, **13**, (10), 2708-2713.
23. Ding, X.; Li, Y.; Zhao, J.; Zhu, Y.; Li, Y.; Deng, W.; Wang, C. Enhanced photocatalytic H<sub>2</sub> evolution over CdS/Au/g-C<sub>3</sub>N<sub>4</sub> composite photocatalyst under visible-light irradiation. *APL Mater.* 2015, **3**, (10).
24. Ge, L.; Zuo, F.; Liu, J.; Ma, Q.; Wang, C.; Sun, D.; Bartels, L.; Feng, P. Synthesis and Efficient Visible Light Photocatalytic Hydrogen Evolution of Polymeric g-C<sub>3</sub>N<sub>4</sub> Coupled with CdS Quantum Dots. *J. Phys. Chem. C* 2012, **116**, (25), 13708-13714.
25. Zong, X.; Han, J.; Ma, G.; Yan, H.; Wu, G.; Li, C. Photocatalytic H<sub>2</sub> Evolution on CdS Loaded with WS<sub>2</sub> as Cocatalyst under Visible Light Irradiation. *J. Phys. Chem. C* 2011, **115**, (24), 12202-12208.
26. Li, Q.; Guo, B.; Yu, J.; Ran, J.; Zhang, B.; Yan, H.; Gong, J. R. Highly efficient visible-light-driven photocatalytic hydrogen production of CdS-cluster-decorated graphene nanosheets. *J Am Chem Soc* 2011, **133**, (28), 10878-84.
27. Ning, X.; Zhen, W.; Wu, Y.; Lu, G. Inhibition of CdS photocorrosion by Al<sub>2</sub>O<sub>3</sub> shell for highly stable photocatalytic overall water splitting under visible light irradiation. *Appl. Catal., B* 2018, **226**, 373-383.
